# Supplementary material for: Synthesis and Evaluation of a Silver Nanoparticle/Polyurethane Composite That Exhibits Antiviral Activity against SARS-CoV-2
Source: MDPI journal article supplement (doi:10.3390/polym14194172), 2022-10-04

Synthesis and evaluation of a silver nanoparticle/polyurethane composite that exhibits antiviral activity against SARS-CoV-2.

FTIR spectra of PU1 and PU1/AgNP

Page S1

Stress Strain Calculation Methods and Equations

Page S2

$^{13}\text{C}$  NMR spectrum of PU1

Page S3

**Figure S1.** FTIR spectra of **PU1** (green – top spectrum) and **PU1/AgNPs** (Blue – lower spectrum).

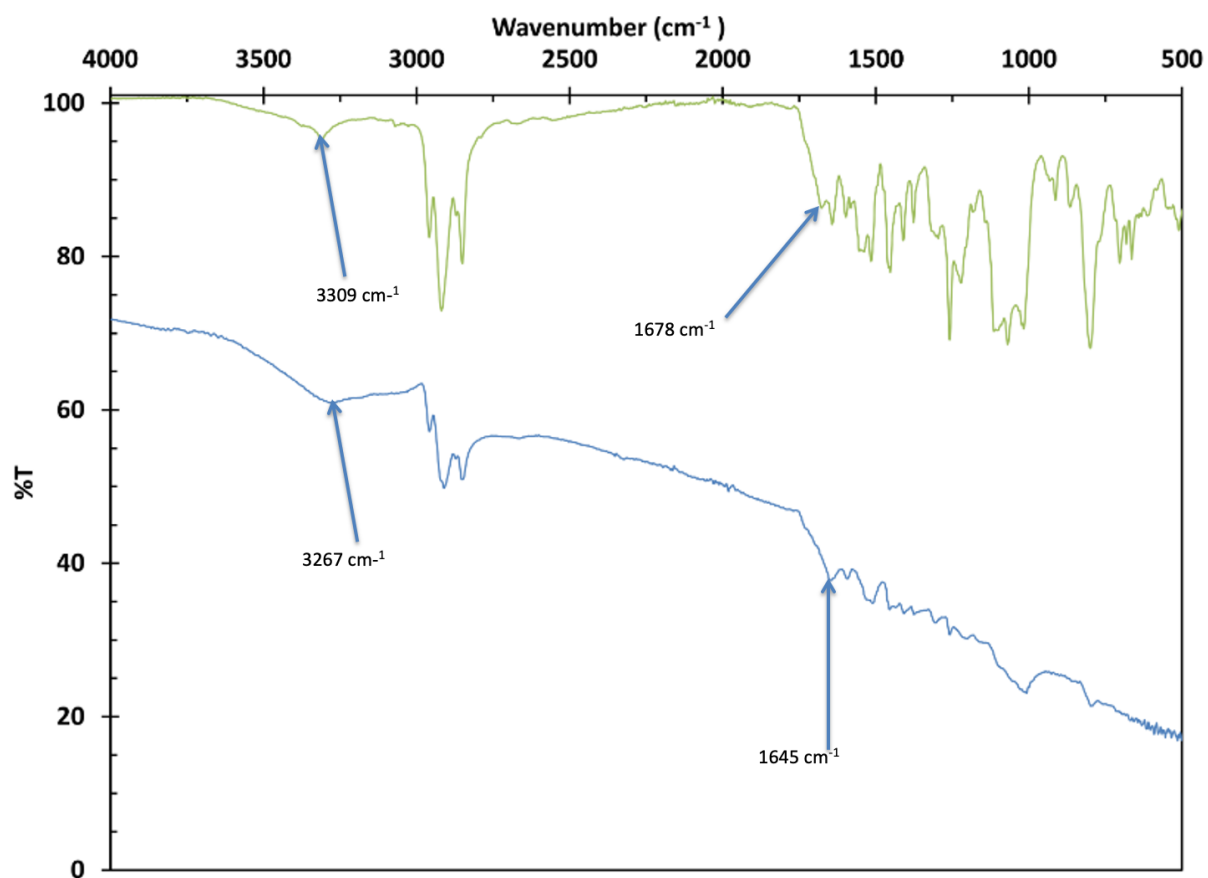

### Stress Strain Calculation Methods and Equations:

The maximum force at break (N) was taken from the recorded data without any further calculation

The Ultimate Tensile Strength (UTS) (MPa) was calculated using the following equation:

$$UTS \text{ (MPa)} = \frac{\text{Maximum Force (N)}}{\text{Cross sectional area of the pristine sample (mm}^2\text{)}}$$

Young's Modulus is calculated from the gradient of the force x extension graph at initial force using the equation.

$$\text{Young's Modulus (MPa)} = \frac{\text{Change in Force (N)}}{\text{Change in extension (mm}^2\text{)}}$$

The Elongation at break (EaB) is calculated by taking the change in extension of the sample at break and dividing by the initial length of the material, and reported as a percentage.

$$EaB \text{ (\%)} = \frac{\text{Elongation at break} - \text{Length of Original Sample (mm)}}{\text{Length of Original Sample (mm)}} \times 100$$

The Modulus of Toughness is the area under the stress strain graph, and can be calculated by using the trapezium rule; where by the area of the graph is split into trapeziums at each consecutive point, and the sum of the area of each trapezium is totalled to give the Modulus of Toughness.

$$\text{Modulus of Toughness} = \sum (0.5 \times (\text{Stress A} + \text{Stress B}) \times (\text{Strain B} - \text{Strain A}))$$

**Figure S2.**  $^{13}\text{C}$  NMR spectrum of PU1 (150 MHz,  $\text{CDCl}_3$ ).

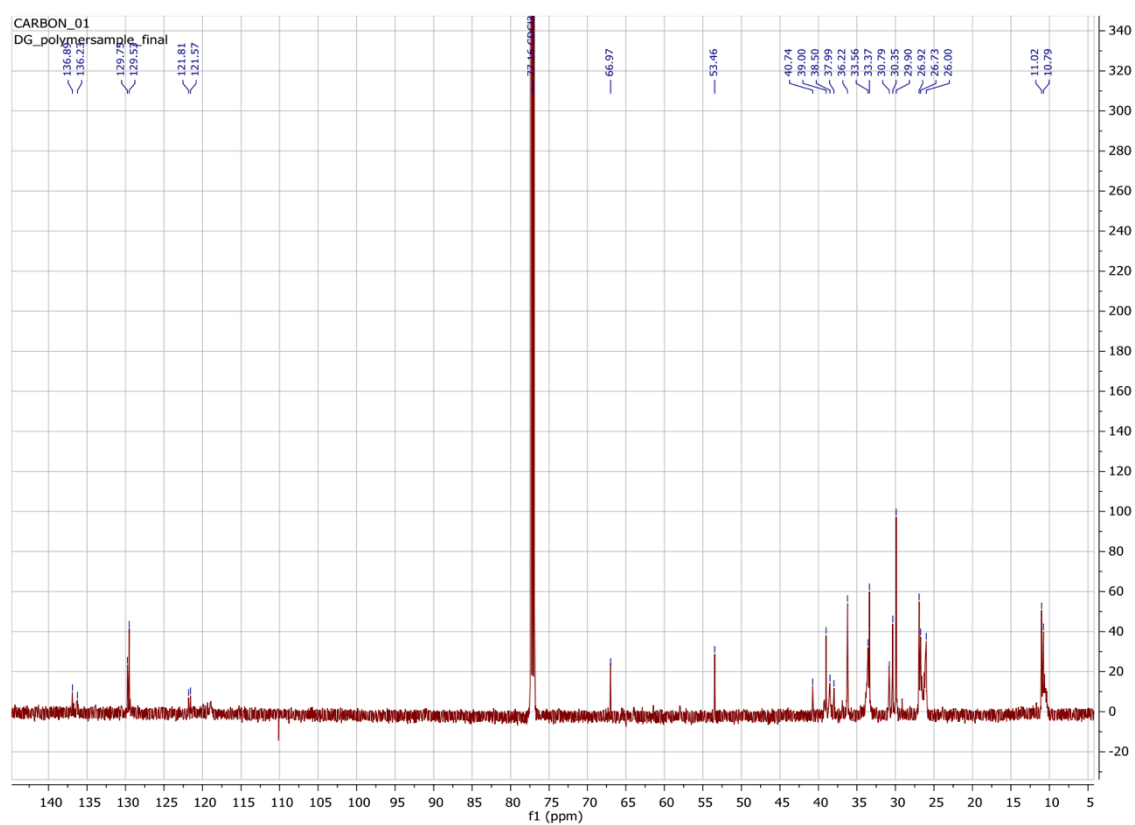

Supplement: s1 [file s1]
